# Supplementary material for: Developmental Coordination Disorder before the Age of Three: A Longitudinal Retrospective Study in a Belgian Center for Developmental Disabilities
Source: MDPI journal article supplement (doi:10.3390/children9030334), 2022-03-02
Supplement: s1 [file s1]

**Table S1. List of excluded diagnoses.**

|                                   |                                                                                                                                                                                                                                                                                                     |
|-----------------------------------|-----------------------------------------------------------------------------------------------------------------------------------------------------------------------------------------------------------------------------------------------------------------------------------------------------|
| Central neurological disorder     | Cerebral palsy                                                                                                                                                                                                                                                                                      |
| Skeletal dysfunctions             | Arthrogryposis<br>Extreme skeletal problems                                                                                                                                                                                                                                                         |
| Peripheral neurological disorders | Obstetric Brachial Plexus Lesion                                                                                                                                                                                                                                                                    |
| Specific syndromes                | Aarskog syndrome<br>Angelman syndrome<br>Beals syndrome<br>Charge syndrome<br>Down syndrome<br>Fragile X syndrome<br>Goldenhar syndrome<br>Gorlin syndrome<br>Joubert syndrome<br>Klinefelter syndrome<br>Moebius syndrome<br>Poland syndrome<br>Prader-Willi syndrome<br>Williams- Beuren syndrome |
| Neuromuscular diseases            | Muscular dystrophy (Becker muscular dystrophy, Duchenne, Strümpell-lorrain disease)<br>Myopathy                                                                                                                                                                                                     |
| Spinal cord abnormalities         | Chiari malformation<br>Meningomyelocele<br>Spina bifida                                                                                                                                                                                                                                             |

**Table S2. Frequency of movement-quality descriptions in the different age groups**

| Age group                               | 0-6mo | 6-12mo | 12-18mo | 18mo-3y |
|-----------------------------------------|-------|--------|---------|---------|
| Number of children                      | 223   | 221    | 111     | 449     |
|                                         |       |        |         |         |
| <b>Hypotonia</b>                        |       |        |         |         |
| General Hypotonia                       | 27    | 74     | 49      | 135     |
| Mild hypotonia                          | 30    | 43     | 21      | 82      |
| Severe hypotonia                        | 0     | 1      | 4       | 2       |
| Proximal Hypotonia                      | 72    | 87     | 28      | 84      |
| Distal Hypotonia                        | 10    | 11     | 6       | 13      |
| Hypotonia face                          | 3     | 2      | 5       | 24      |
| Problems moving against gravity         | 10    | 4      | 0       | 0       |
| <b>Hypertonia</b>                       |       |        |         |         |
| General hypertonia                      | 126   | 59     | 18      | 41      |
| Mild hypertonia                         | 36    | 11     | 1       | 13      |
| Severe hypertonia                       | 1     | 0      | 0       | 0       |
| Proximal hypertonia                     | 10    | 5      | 3       | 1       |
| Distal hypertonia                       | 94    | 57     | 12      | 59      |
| <b>Laxity</b>                           |       |        |         |         |
| General laxity                          | 6     | 50     | 35      | 127     |
| Laxity lower limbs                      | 26    | 54     | 33      | 100     |
| Laxity upper limbs                      | 0     | 1      | 3       | 9       |
| <b>Poor muscle force</b>                |       |        |         |         |
| General force problem                   | 4     | 3      | 4       | 18      |
| Force problems lower limbs              | 0     | 0      | 2       | 1       |
| Force problems upper limbs              | 1     | 0      | 1       | 1       |
| Force problems of the abdominal muscles | 14    | 0      | 0       | 7       |
| <b>Asymmetry</b>                        |       |        |         |         |
| General asymmetry                       | 33    | 14     | 9       | 11      |
| Asymmetry lower limbs                   | 32    | 22     | 7       | 29      |
| Asymmetry upper limbs                   | 32    | 12     | 3       | 4       |
| Asymmetry of the head                   | 90    | 11     | 5       | 9       |
| Asymmetry of the trunk                  | 2     | 4      | 0       | 0       |
| Plagiocephaly                           | 36    | 17     | 6       | 8       |
| <b>Poor motor control</b>               |       |        |         |         |
| General control problems                | 23    | 19     | 3       | 12      |
| Problems with trunc control             | 47    | 32     | 10      | 17      |
| Problems with head control              | 36    | 6      | 0       | 0       |
| <b>Poor motor regulation</b>            |       |        |         |         |
| Problems with Gradation of movements    | 4     | 21     | 9       | 13      |

|                                                  |    |    |    |     |
|--------------------------------------------------|----|----|----|-----|
| Overshooting                                     | 1  | 1  | 1  | 1   |
| Tone regulation problems                         | 20 | 19 | 4  | 13  |
| <b>Poor motor organization</b>                   |    |    |    |     |
| Problems with postural changes                   | 4  | 50 | 8  | 15  |
| Problems of movement organization on the midline | 38 | 2  | 0  | 0   |
| Problems in organizing movements                 | 24 | 8  | 2  | 15  |
| Problems in organizing weight shift              | 8  | 23 | 6  | 12  |
| Chaotic movements                                | 8  | 4  | 0  | 0   |
| <b>Poor motor coordination</b>                   |    |    |    |     |
| Mild coordination problems                       | 1  | 0  | 1  | 27  |
| Moderate coordination problems                   | 0  | 1  | 0  | 1   |
| General coordination problems                    | 11 | 16 | 6  | 91  |
| Stiff movements                                  | 12 | 16 | 12 | 115 |
| Clumsy movements                                 | 0  | 0  | 0  | 3   |
| Awkward movements                                | 0  | 0  | 0  | 2   |
| Jerky                                            | 0  | 0  | 0  | 2   |
| Shaky movements                                  | 6  | 1  | 0  | 1   |
| Disturbed coordination                           | 0  | 0  | 1  | 2   |
| Disturbed mimmanual coordination                 | 0  | 1  | 0  | 34  |
| Use of dystonic like movements                   | 6  | 5  | 1  | 1   |
| Use of diskenetic like movement                  | 0  | 1  | 0  | 1   |
| Disturbed diadochokinesis                        | 0  | 0  | 0  | 4   |
| <b>Poor balance</b>                              |    |    |    |     |
| Mild Balance Problems                            | 0  | 0  | 2  | 27  |
| Moderate balance problems                        | 0  | 0  | 0  | 0   |
| Severe balance problems                          | 0  | 1  | 0  | 1   |
| Wider base of support                            | 0  | 0  | 12 | 58  |
| Atactic like movements                           | 0  | 2  | 1  | 5   |
| Drunken appearing gait                           | 0  | 0  | 0  | 1   |
| Stumbling                                        | 0  | 5  | 7  | 40  |
| Poor balance reactions                           | 0  | 5  | 2  | 6   |
| Poor balance                                     | 0  | 5  | 5  | 75  |
| Slower supporting reactions                      | 0  | 5  | 0  | 2   |
| Slower balance reactions                         | 0  | 1  | 1  | 0   |
| <b>Soft signs</b>                                |    |    |    |     |
| Tremor                                           | 7  | 9  | 7  | 28  |
| Dysmetria                                        | 0  | 2  | 1  | 8   |
| Clonus                                           | 3  | 1  | 1  | 4   |
| Overflow upper limbs                             | 1  | 0  | 0  | 0   |
| <b>Poor motor dissociation</b>                   |    |    |    |     |
| Stereotyped movements                            | 7  | 4  | 0  | 4   |

---

|                            |    |    |    |    |
|----------------------------|----|----|----|----|
| Less dissociated movements | 3  | 2  | 0  | 0  |
| Less selectivity           | 8  | 5  | 0  | 2  |
| Dissociating problems      | 21 | 33 | 11 | 12 |
| <b>Poor motor planning</b> |    |    |    |    |
| Global planning problems   | 0  | 0  | 1  | 16 |
| Action planning problems   | 0  | 3  | 0  | 18 |
| Poor motor planning        | 0  | 1  | 3  | 18 |
